# Supplementary material for: Introducing mesoscopic charge transfer rates into molecular electronics
Source: Royal Society of Chemistry journal article supplement (doi:10.1039/d0cp01621g), 2020-01-01
Supplement: d0cp01621g1.pdf [file d0cp01621g1.pdf]

# Electronic Supplementary information for

## Introducing Mesoscopic Charge Transfer Rates into Molecular Electronics

Adriano Santos<sup>a</sup>, Ushula M. Tefashe<sup>b</sup>, Richard L. McCreery<sup>b,#</sup>, Paulo R. Bueno<sup>a,\*</sup>

<sup>a</sup>Institute of Chemistry, São Paulo State University (UNESP), Araraquara, São Paulo, Brazil.

<sup>b</sup>Department of Chemistry, University of Alberta, Edmonton, Alberta T6G 2G2, Canada.

\*[prbueno@iq.unesp.br](mailto:prbueno@iq.unesp.br), phone: +55 16 3301 9642, fax: +55 16 3322 2308, Instituto de Química, Universidade Estadual Paulista, CP 355, 14800-900 Araraquara, São Paulo, Brazil

#[richard.mccreery@ualberta.ca](mailto:richard.mccreery@ualberta.ca), phone: (780) 641-1760, fax: (780) 641-1601, Department of Chemistry, 114227, Saskatchewan Drive, University of Alberta, Edmonton, Alberta T6G 2G2, Canada

### ESI-1. ELECTROCHEMICAL GRAFTING OF AB MOLECULAR LAYER, DETERMINATION OF MOLECULAR LAYER THICKNESS BY AFM AND FABRICATION OF MOLECULAR JUNCTIONS.

Electrochemical grafting of the AB molecular layers was performed on a CHI (Model 420a) electrochemical workstation using standard 3 electrodes setup with a 0.1 M TBABF<sub>6</sub> electrolyte dissolved in acetonitrile. The eC bottom contact was used as working electrode (WE), a Pt wire as the counter electrode (CE) and an Ag|Ag<sup>+</sup> reference electrode (RE). Representative examples of grafting cyclic voltammograms (CVs) were provided in Figure ESI. 1. Large area “all carbon” molecular junctions were fabricated as reported previously.<sup>1</sup>

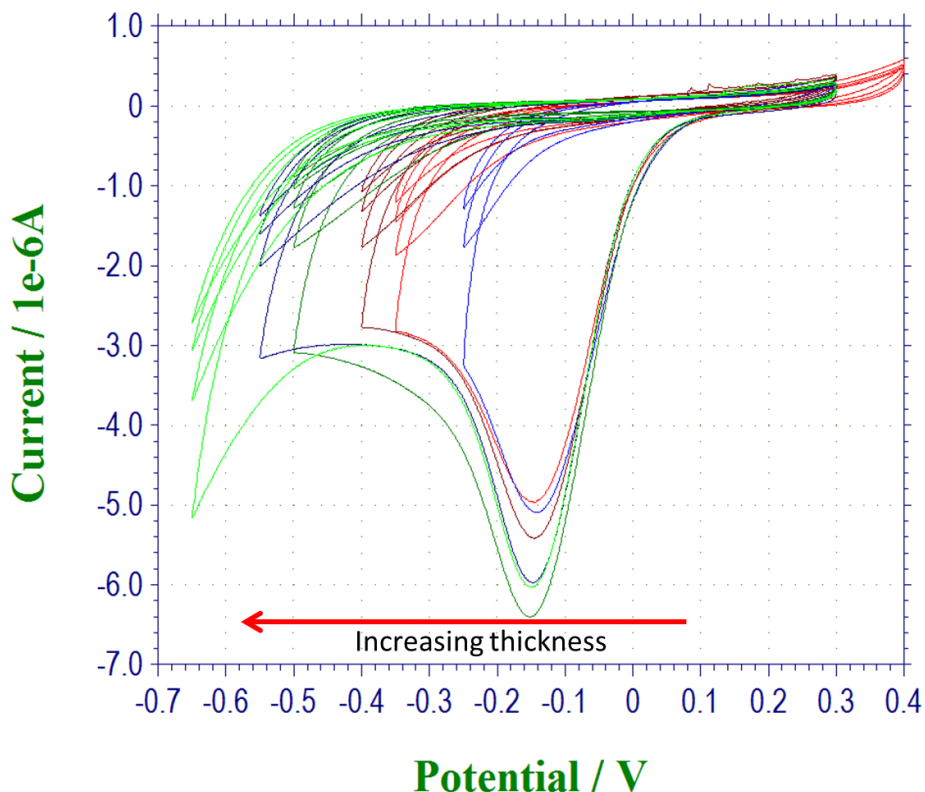

Figure ESI. 1. Examples of AB molecular grafting CVs on Cr<sub>4</sub>/Au<sub>30</sub>/eC<sub>10</sub>.

**Table ESI. 1.** Electrochemical grafting parameters for AB on Cr<sub>4</sub>/Au<sub>30</sub>/eC<sub>10</sub>: CV scan range, number of CV scans, sweep rate, AFM “scratch” thickness.

| Molecules | CV scan range (V vs. Ag/Ag <sup>+</sup> ) | No. of CV scans | Scan rate (mV/s) | AFM “scratch” thickness (nm) |
|-----------|-------------------------------------------|-----------------|------------------|------------------------------|
| AB        | 0.3– (-0.40)                              | 4               | 50               | 2.5 ± 0.14                   |
|           | 0.3 – (-0.45)                             | 4               | 50               | 3.1 ± 0.34                   |
|           | 0.3 – (-0.50)                             | 4               | 50               | 3.6 ± 0.39                   |
|           | 0.4 – (-0.55)                             | 4               | 50               | 5.0*                         |
|           | 0.4 – (-0.60)                             | 4               | 50               | 5.1*                         |
|           | 0.4 – (-0.60)                             | 5               | 50               | 6.6*                         |
|           | 0.3 – (-0.65)                             | 5               | 50               | 8.4 ± 0.59                   |

\*thickness estimated using the beta plot reported previously.<sup>2</sup>

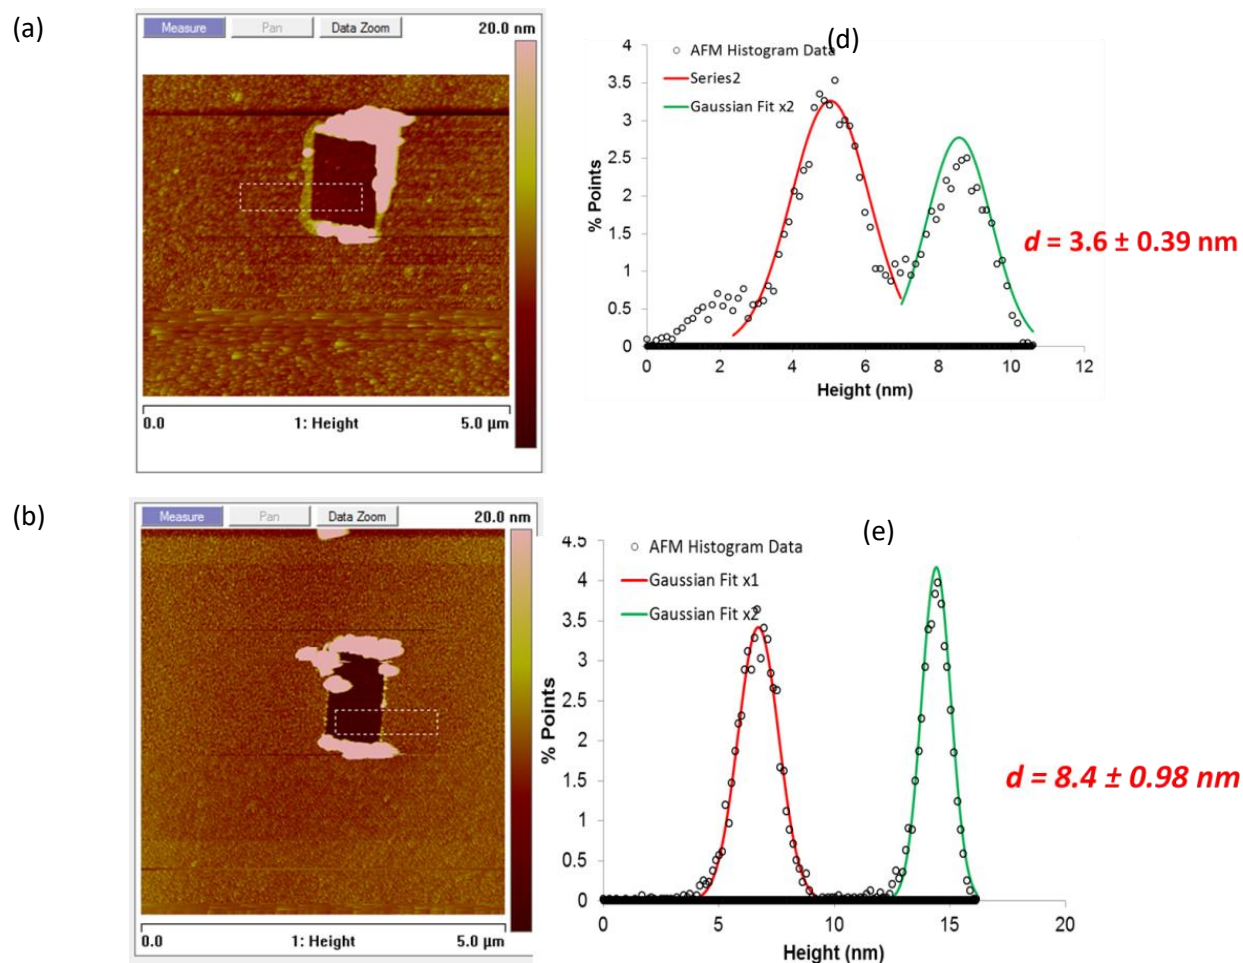

**Figure ESI. 2.** Examples of tapping mode AFM image of AB layer after scratching the molecular layer (a and b), histogram of the height data and the corresponding fitted Gaussian distribution for thickness determination for AB layer (c and d). Thickness of AB molecular layer shown with associated uncertainty.

## ESI-2. EXAMPLES OF DATA FITTING AND PARAMETERS DETERMINATION

Table ESI. 1. Data fitting using the equivalent circuit shown in Figure 1b (main text) for 6.6 nm thickness film ( $A = 0.00125 \text{ cm}^2$ ) at different bias potentials.  $R_c$  is the contact resistance ( $\Omega$ ),  $C_\mu$  the capacitance ( $F$ ),  $k$  the rate of electron transport ( $s^{-1}$ ),  $G$  the conductance ( $S$ ) and  $j$  the current density ( $A. \text{cm}^{-2}$ ).

| Bias (mV) | $R_c$ ( $\Omega$ ) | $C_\mu$ (nF) | $R$ (k $\Omega$ ) | $k = 1/RC_\mu$ ( $s^{-1}$ ) | $G = 1/R$ ( $\mu S$ ) | $j = GV/A$ (mA. $\text{cm}^{-2}$ ) |
|-----------|--------------------|--------------|-------------------|-----------------------------|-----------------------|------------------------------------|
| 0         | 25.4               | 0.948        | 7,880             | 134                         | 0.1269                | -                                  |
| 100       | 25.8               | 0.925        | 3,960             | 273                         | 0.2525                | 0.0202                             |
| -100      | 25.6               | 0.923        | 4,310             | 251                         | 0.2320                | -0.0186                            |
| 200       | 26.0               | 0.924        | 1,400             | 773                         | 0.7143                | 0.1143                             |
| -200      | 26.0               | 0.911        | 1,610             | 682                         | 0.6211                | -0.0994                            |
| 300       | 26.0               | 0.923        | 558               | 1,942                       | 1.79                  | 0.4301                             |
| -300      | 26.1               | 0.910        | 603               | 1,822                       | 1.65                  | -0.3980                            |
| 350       | 27.0               | 0.919        | 354               | 3,074                       | 2.82                  | 0.7910                             |
| -350      | 26.2               | 0.911        | 381               | 2,881                       | 2.62                  | -0.7349                            |
| 400       | 27.3               | 0.919        | 230               | 4,731                       | 4.34                  | 1.3913                             |
| -400      | 26.2               | 0.913        | 248               | 4,416                       | 4.03                  | -1.2903                            |

Table ESI. 2. Data fitting using the equivalent circuit shown in Figure 1b (main text) for 5.1 nm thickness film ( $A = 0.00125 \text{ cm}^2$ ) in different bias potentials.  $R_c$  is the contact resistance ( $\Omega$ ),  $C_\mu$  the capacitance ( $F$ ),  $k$  the rate of electron transport ( $s^{-1}$ ),  $G$  the conductance ( $S$ ) and  $j$  the current density ( $A. \text{cm}^{-2}$ ).

| Bias (mV) | $R_c$ ( $\Omega$ ) | $C_\mu$ (nF) | $R$ (k $\Omega$ ) | $k = 1/RC_\mu$ ( $s^{-1}$ ) | $G = 1/R$ ( $\mu S$ ) | $j = GV/A$ (mA. $\text{cm}^{-2}$ ) |
|-----------|--------------------|--------------|-------------------|-----------------------------|-----------------------|------------------------------------|
| 0         | 31.1               | 1.18         | 377               | 2,248                       | 2.65                  | -                                  |
| 100       | 30.5               | 1.20         | 181               | 4,604                       | 5.52                  | 0.442                              |
| -100      | 30.8               | 1.19         | 181               | 4,643                       | 5.52                  | -0.442                             |
| 200       | 30.5               | 1.22         | 61.4              | 13,350                      | 16.3                  | 2.606                              |
| -200      | 30.0               | 1.22         | 61.0              | 13,350                      | 16.3                  | -2.606                             |
| 300       | 30.5               | 1.24         | 23.3              | 34,612                      | 42.9                  | 10.300                             |
| -300      | 29.6               | 1.25         | 22.8              | 35,088                      | 43.9                  | -10.526                            |
| 350       | 30.4               | 1.25         | 14.8              | 54,054                      | 67.6                  | 18.919                             |
| -350      | 29.5               | 1.26         | 14.4              | 55,115                      | 69.4                  | -19.444                            |
| 400       | 30.7               | 1.25         | 9.68              | 82,645                      | 103.3                 | 33.058                             |
| -400      | 29.4               | 1.26         | 9.31              | 85,247                      | 107.4                 | -34.372                            |

Table ESI. 3. Data fitting using the equivalent circuit shown in Figure 1b (main text) for 5.0 nm thickness film ( $A = 0.00125 \text{ cm}^2$ ) in different bias potentials.  $R_c$  is the contact resistance ( $\Omega$ ),  $C_\mu$  the capacitance ( $F$ ),  $k$  the rate of electron transport ( $s^{-1}$ ),  $G$  the conductance ( $S$ ) and  $j$  the current density ( $A. \text{cm}^{-2}$ ).

| Bias (mV) | $R_c$ ( $\Omega$ ) | $C_\mu$ (nF) | $R$ (k $\Omega$ ) | $k = 1/RC_\mu$ ( $s^{-1}$ ) | $G = 1/R$ ( $\mu S$ ) | $j = GV/A$ (mA. $\text{cm}^{-2}$ ) |
|-----------|--------------------|--------------|-------------------|-----------------------------|-----------------------|------------------------------------|
| 0         | 24.9               | 1.40         | 164.0             | 4,355                       | 6.10                  | -                                  |
| 100       | 24.9               | 1.40         | 80.2              | 8,906                       | 12.47                 | 0.998                              |
| -100      | 25.3               | 1.38         | 82.9              | 8,741                       | 12.06                 | -0.965                             |
| 200       | 25.3               | 1.39         | 27.7              | 25,972                      | 36.10                 | 5.776                              |
| -200      | 25.2               | 1.37         | 28.7              | 25,433                      | 34.84                 | -5.575                             |
| 300       | 25.8               | 1.37         | 10.8              | 67,586                      | 92.59                 | 22.222                             |
| -300      | 25.7               | 1.35         | 11.0              | 67,340                      | 90.91                 | -21.818                            |
| 350       | 25.3               | 1.37         | 6.94              | 105,177                     | 144.09                | 40.346                             |
| -350      | 25.6               | 1.34         | 7.16              | 104,227                     | 139.66                | -39.106                            |
| 400       | 25.9               | 1.35         | 4.58              | 161,734                     | 218.34                | 69.869                             |
| -400      | 25.6               | 1.34         | 4.72              | 158,108                     | 211.86                | -67.797                            |

### ESI-3. COMPARISON BETWEEN CURRENT DENSITIES OBTAINED BY I-V AND IS.

Impedance spectroscopy (IS) was carried out using an AUTOLAB potentiostat equipped with a frequency response analysis (FRA) module and NOVA software from Metrohm. Conditions: frequency range from 5 MHz to 0.1 Hz (~170 frequencies logarithmically arranged), amplitude of 10 mV. Bias of 100 mV. Nyquist data was fitted using NOVA software with the circuit shown in Figure 1b in order to obtain circuit parameters. The conductance ( $G$ ) and current densities ( $j$ ) from IS were calculated as  $G = 1/R$  and  $j = GV/A$ , where  $R$  is the resistance,  $V$  the bias potential and  $A$  the area, 0.00125 cm<sup>2</sup> (examples in ESI-2).

I-V curves were obtained using an AUTOLAB potentiostat controlled by Nova software from Metrohm. Conditions: bias potentials ranging from -0.4 V to 0.4 V, at 100 mV.s<sup>-1</sup>. Only data obtained at 100 mV bias are shown.

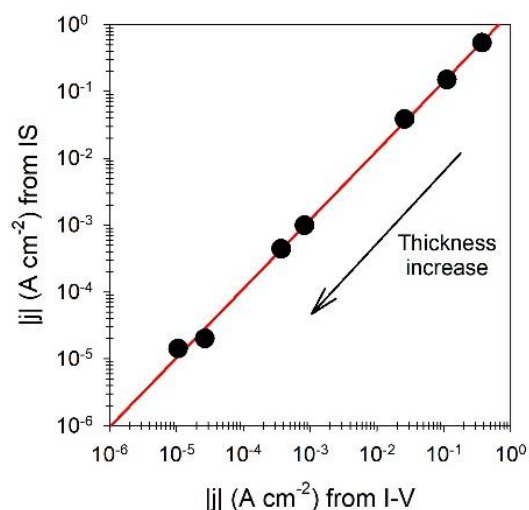

**Figure ESI.3.** Example of modulus of current density  $|j|$  calculated from impedance spectroscopy (IS) plotted versus  $|j|$  obtained from current-voltage measurements (I-V). The results present a high correlation, with  $r^2=99.8\%$ .

The natural logarithm dependence of the current density signal obtained by I-V with the molecular junction thickness  $L$ , as given by  $\ln|j| \propto -\beta L$  (attenuation plot), is in concordance with previous work for 100 mV bias ( $\beta = \sim 2.6 \text{ nm}^{-1}$ , Figure ESI.4).<sup>2</sup> As comparison between I-V and IS approaches,  $\beta$  value obtained by IS has presented a similar value of  $\beta = \sim 2.6 \text{ nm}^{-1}$ , Figure ESI.4.

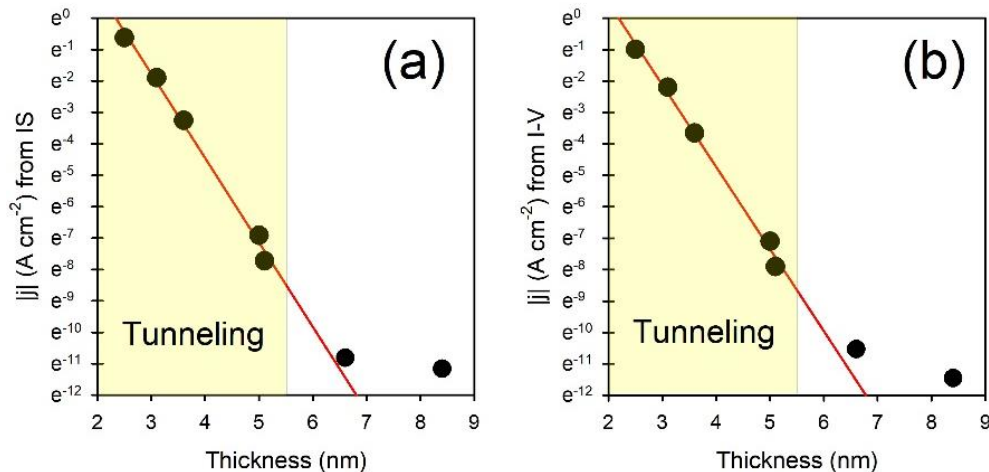

**Figure ESI.4.** Modulus of natural logarithm of current density ( $|j|$ ) versus molecular junction thickness ( $L$ ), obtained for both (a) IS and (b) I-V approaches at 100 mV bias. The fittings were performed from thickness from 2.6 to 5.1 nm, where quantum mechanical tunneling is operative<sup>2</sup> ( $r^2 > 99\%$ ).

## References

1. A. Morteza Najarian, B. Szeto, U. M. Tefashe and R. L. McCreery, *ACS Nano*, 2016, **10**, 8918-8928.
2. S. Y. Sayed, J. A. Fereiro, H. Yan, R. L. McCreery and A. J. Bergren, *Proceedings of the National Academy of Sciences*, 2012, **109**, 11498.
